# Supplementary material for: Comparative Genome Analysis of Lactobacillus rhamnosus Clinical Isolates from Initial Stages of Dental Pulp Infection: Identification of a New Exopolysaccharide Cluster
Source: PLoS One. 2014 Mar 14;9(3):e90643. doi: 10.1371/journal.pone.0090643 (PMC3954586; doi:10.1371/journal.pone.0090643)
Supplement: Table S3 — Genes from the reference L. rhamnosus strain GG not present in both assemblies. (XLS) [file pone.0090643.s004.xls]

## Sheet: Sheet1
Table S3 Genes from the reference L. rhamnosus strain GG not present in both assemblies.
gi|258507015|ref|YP_003169766.1|	transposase IS30 family protein [Lactobacillus rhamnosus GG]
gi|258507017|ref|YP_003169768.1|	transposase IS5 family protein [Lactobacillus rhamnosus GG]
gi|258507019|ref|YP_003169770.1|	hypothetical protein LGG_00024 [Lactobacillus rhamnosus GG]
gi|258507021|ref|YP_003169772.1|	transposase IS5 family protein [Lactobacillus rhamnosus GG]
gi|258507085|ref|YP_003169836.1|	PTS system transporter subunit IICB [Lactobacillus rhamnosus GG]
gi|258507086|ref|YP_003169837.1|	hypothetical protein LGG_00091 [Lactobacillus rhamnosus GG]
gi|258507087|ref|YP_003169838.1|	PTS system transporter subunit IIA [Lactobacillus rhamnosus GG]
gi|258507088|ref|YP_003169839.1|	alpha-mannosidase (GH38) [Lactobacillus rhamnosus GG]
gi|258507089|ref|YP_003169840.1|	hypothetical protein LGG_00094 [Lactobacillus rhamnosus GG]
gi|258507090|ref|YP_003169841.1|	beta-glucosidase (GH1) [Lactobacillus rhamnosus GG]
gi|258507091|ref|YP_003169842.1|	ROK family protein [Lactobacillus rhamnosus GG]
gi|258507102|ref|YP_003169853.1|	dTDP-4-dehydrorhamnose 3,5-epimerase [Lactobacillus rhamnosus GG]
gi|258507134|ref|YP_003169885.1|	hypothetical protein LGG_00139 [Lactobacillus rhamnosus GG]
gi|258507135|ref|YP_003169886.1|	hypothetical protein LGG_00140 [Lactobacillus rhamnosus GG]
gi|258507138|ref|YP_003169889.1|	hypothetical protein LGG_00143 [Lactobacillus rhamnosus GG]
gi|258507139|ref|YP_003169890.1|	transposase [Lactobacillus rhamnosus GG]
gi|258507147|ref|YP_003169898.1|	transposase [Lactobacillus rhamnosus GG]
gi|258507148|ref|YP_003169899.1|	transposase IS4 family protein [Lactobacillus rhamnosus GG]
gi|258507165|ref|YP_003169916.1|	hypothetical protein LGG_00170 [Lactobacillus rhamnosus GG]
gi|258507166|ref|YP_003169917.1|	hypothetical protein LGG_00171 [Lactobacillus rhamnosus GG]
gi|258507167|ref|YP_003169918.1|	taurine ABC transporter ATP-binding protein [Lactobacillus rhamnosus GG]
gi|258507168|ref|YP_003169919.1|	ABC transporter aliphatic sulfonates family ligand-binding protein [Lactobacillus rhamnosus GG]
gi|258507169|ref|YP_003169920.1|	taurine transport system permease [Lactobacillus rhamnosus GG]
gi|258507170|ref|YP_003169921.1|	pyridine nucleotide-disulphide oxidoreductase family protein [Lactobacillus rhamnosus GG]
gi|258507171|ref|YP_003169922.1|	membrane protein [Lactobacillus rhamnosus GG]
gi|258507172|ref|YP_003169923.1|	LysR family transcriptional regulator [Lactobacillus rhamnosus GG]
gi|258507230|ref|YP_003169981.1|	transposase [Lactobacillus rhamnosus GG]
gi|258507231|ref|YP_003169982.1|	transposase IS4 family protein [Lactobacillus rhamnosus GG]
gi|258507273|ref|YP_003170024.1|	hypothetical protein LGG_00278 [Lactobacillus rhamnosus GG]
gi|258507274|ref|YP_003170025.1|	dTDP-rhamnosyl transferase rfbF [Lactobacillus rhamnosus GG]
gi|258507275|ref|YP_003170026.1|	alpha-L-Rha alpha-1,3-L-rhamnosyltransferase [Lactobacillus rhamnosus GG]
gi|258507276|ref|YP_003170027.1|	alpha-L-Rha alpha-1,3-L-rhamnosyltransferase [Lactobacillus rhamnosus GG]
gi|258507277|ref|YP_003170028.1|	PST system family polysaccharide transporter [Lactobacillus rhamnosus GG]
gi|258507278|ref|YP_003170029.1|	hypothetical protein LGG_00283 [Lactobacillus rhamnosus GG]
gi|258507339|ref|YP_003170090.1|	transposase IS5 family protein [Lactobacillus rhamnosus GG]
gi|258507371|ref|YP_003170122.1|	transposase IS5 family protein [Lactobacillus rhamnosus GG]
gi|258507378|ref|YP_003170129.1|	transposase IS5 family protein [Lactobacillus rhamnosus GG]
gi|258507398|ref|YP_003170149.1|	transposase IS30 family protein [Lactobacillus rhamnosus GG]
gi|258507407|ref|YP_003170158.1|	transposase IS30 family protein [Lactobacillus rhamnosus GG]
gi|258507429|ref|YP_003170180.1|	beta-N-acetylhexosaminidase (GH3) [Lactobacillus rhamnosus GG]
gi|258507430|ref|YP_003170181.1|	transposase IS30 family protein [Lactobacillus rhamnosus GG]
gi|258507431|ref|YP_003170182.1|	resolvase [Lactobacillus rhamnosus GG]
gi|258507432|ref|YP_003170183.1|	cytosolic protein [Lactobacillus rhamnosus GG]
gi|258507433|ref|YP_003170184.1|	hypothetical protein LGG_00438 [Lactobacillus rhamnosus GG]
gi|258507434|ref|YP_003170185.1|	hypothetical protein LGG_00439 [Lactobacillus rhamnosus GG]
gi|258507435|ref|YP_003170186.1|	hypothetical protein LGG_00440 [Lactobacillus rhamnosus GG]
gi|258507436|ref|YP_003170187.1|	sortase family protein [Lactobacillus rhamnosus GG]
gi|258507437|ref|YP_003170188.1|	pilus specific protein [Lactobacillus rhamnosus GG]
gi|258507438|ref|YP_003170189.1|	pilus specific protein [Lactobacillus rhamnosus GG]
gi|258507439|ref|YP_003170190.1|	pilus specific protein [Lactobacillus rhamnosus GG]
gi|258507440|ref|YP_003170191.1|	transposase IS30 family protein [Lactobacillus rhamnosus GG]
gi|258507444|ref|YP_003170195.1|	UvrD/REP helicase [Lactobacillus rhamnosus GG]
gi|258507445|ref|YP_003170196.1|	hypothetical protein LGG_00450 [Lactobacillus rhamnosus GG]
gi|258507446|ref|YP_003170197.1|	transposase IS5 family protein [Lactobacillus rhamnosus GG]
gi|258507447|ref|YP_003170198.1|	transposase IS3/IS911 family protein [Lactobacillus rhamnosus GG]
gi|258507448|ref|YP_003170199.1|	transposase IS150/IS3 family protein [Lactobacillus rhamnosus GG]
gi|258507449|ref|YP_003170200.1|	transposase IS150/IS3 family protein [Lactobacillus rhamnosus GG]
gi|258507451|ref|YP_003170202.1|	cation-transporting ATPase [Lactobacillus rhamnosus GG]
gi|258507452|ref|YP_003170203.1|	transposase [Lactobacillus rhamnosus GG]
gi|258507453|ref|YP_003170204.1|	transposase IS4 family protein [Lactobacillus rhamnosus GG]
gi|258507455|ref|YP_003170206.1|	transposase IS4 family protein [Lactobacillus rhamnosus GG]
gi|258507456|ref|YP_003170207.1|	transposase [Lactobacillus rhamnosus GG]
gi|258507457|ref|YP_003170208.1|	transposase [Lactobacillus rhamnosus GG]
gi|258507459|ref|YP_003170210.1|	transposase IS30 family protein [Lactobacillus rhamnosus GG]
gi|258507461|ref|YP_003170212.1|	transposase IS5 family protein [Lactobacillus rhamnosus GG]
gi|258507472|ref|YP_003170223.1|	opine/octopine dehydrogenase [Lactobacillus rhamnosus GG]
gi|258507473|ref|YP_003170224.1|	amino acid ABC transporter ATP-binding protein [Lactobacillus rhamnosus GG]
gi|258507474|ref|YP_003170225.1|	ABC transporter amino acid binding protein [Lactobacillus rhamnosus GG]
gi|258507475|ref|YP_003170226.1|	amino acid ABC transporter permease [Lactobacillus rhamnosus GG]
gi|258507476|ref|YP_003170227.1|	amino acid ABC transporter permease [Lactobacillus rhamnosus GG]
gi|258507494|ref|YP_003170245.1|	transposase IS5 family protein [Lactobacillus rhamnosus GG]
gi|258507495|ref|YP_003170246.1|	ABC transporter metal ion transporter periplasmic component/surface antigen [Lactobacillus rhamnosus GG]
gi|258507508|ref|YP_003170259.1|	transposase IS5 family protein [Lactobacillus rhamnosus GG]
gi|258507512|ref|YP_003170263.1|	transposase IS5 family protein [Lactobacillus rhamnosus GG]
gi|258507524|ref|YP_003170275.1|	hypothetical protein LGG_00529 [Lactobacillus rhamnosus GG]
gi|258507528|ref|YP_003170279.1|	hypothetical protein LGG_00533 [Lactobacillus rhamnosus GG]
gi|258507530|ref|YP_003170281.1|	hypothetical protein LGG_00535 [Lactobacillus rhamnosus GG]
gi|258507554|ref|YP_003170305.1|	LysR family transcriptional regulator [Lactobacillus rhamnosus GG]
gi|258507556|ref|YP_003170307.1|	sugar phosphate isomerase/epimerase [Lactobacillus rhamnosus GG]
gi|258507557|ref|YP_003170308.1|	short-chain dehydrogenase/reductase SDR [Lactobacillus rhamnosus GG]
gi|258507559|ref|YP_003170310.1|	shikimate 5-dehydrogenase [Lactobacillus rhamnosus GG]
gi|258507560|ref|YP_003170311.1|	transporter major facilitator superfamily MFS_1 [Lactobacillus rhamnosus GG]
gi|258507561|ref|YP_003170312.1|	shikimate 5-dehydrogenase [Lactobacillus rhamnosus GG]
gi|258507571|ref|YP_003170322.1|	hypothetical protein LGG_00576 [Lactobacillus rhamnosus GG]
gi|258507576|ref|YP_003170327.1|	transposase [Lactobacillus rhamnosus GG]
gi|258507577|ref|YP_003170328.1|	transposase IS4 family protein [Lactobacillus rhamnosus GG]
gi|258507584|ref|YP_003170335.1|	hypothetical protein LGG_00589 [Lactobacillus rhamnosus GG]
gi|258507588|ref|YP_003170339.1|	transposase IS5 family protein [Lactobacillus rhamnosus GG]
gi|258507623|ref|YP_003170374.1|	two-component response regulator [Lactobacillus rhamnosus GG]
gi|258507624|ref|YP_003170375.1|	two component sensor transduction histidine kinase [Lactobacillus rhamnosus GG]
gi|258507625|ref|YP_003170376.1|	bacitracin ABC transporter ATP-binding protein [Lactobacillus rhamnosus GG]
gi|258507626|ref|YP_003170377.1|	bacitracin ABC transporter permease [Lactobacillus rhamnosus GG]
gi|258507698|ref|YP_003170449.1|	polyketide synthase expression regulator [Lactobacillus rhamnosus GG]
gi|258507699|ref|YP_003170450.1|	short-chain dehydrogenase/reductase SDR [Lactobacillus rhamnosus GG]
gi|258507700|ref|YP_003170451.1|	acetoacetate decarboxylase [Lactobacillus rhamnosus GG]
gi|258507907|ref|YP_003170658.1|	transposase IS150/IS3 family protein [Lactobacillus rhamnosus GG]
gi|258507908|ref|YP_003170659.1|	transposase IS3 family protein [Lactobacillus rhamnosus GG]
gi|258507945|ref|YP_003170696.1|	hypothetical protein LGG_00950 [Lactobacillus rhamnosus GG]
gi|258507960|ref|YP_003170711.1|	hypothetical protein LGG_00965 [Lactobacillus rhamnosus GG]
gi|258507968|ref|YP_003170719.1|	hypothetical protein LGG_00973 [Lactobacillus rhamnosus GG]
gi|258507969|ref|YP_003170720.1|	hypothetical protein LGG_00974 [Lactobacillus rhamnosus GG]
gi|258508018|ref|YP_003170769.1|	adenine specific DNA methylase Mod [Lactobacillus rhamnosus GG]
gi|258508019|ref|YP_003170770.1|	transposase [Lactobacillus rhamnosus GG]
gi|258508020|ref|YP_003170771.1|	transposase IS4 family protein [Lactobacillus rhamnosus GG]
gi|258508021|ref|YP_003170772.1|	type III restriction-modification system methylation subunit [Lactobacillus rhamnosus GG]
gi|258508022|ref|YP_003170773.1|	type III restriction-modification system restriction subunit [Lactobacillus rhamnosus GG]
gi|258508023|ref|YP_003170774.1|	hypothetical protein LGG_01028 [Lactobacillus rhamnosus GG]
gi|258508024|ref|YP_003170775.1|	transposase IS5 family protein [Lactobacillus rhamnosus GG]
gi|258508058|ref|YP_003170809.1|	hypothetical protein LGG_01063 [Lactobacillus rhamnosus GG]
gi|258508059|ref|YP_003170810.1|	6-phospho-beta-glucosidase [Lactobacillus rhamnosus GG]
gi|258508092|ref|YP_003170843.1|	hypothetical protein LGG_01097 [Lactobacillus rhamnosus GG]
gi|258508093|ref|YP_003170844.1|	hypothetical protein LGG_01098 [Lactobacillus rhamnosus GG]
gi|258508098|ref|YP_003170849.1|	hypothetical protein LGG_01103 [Lactobacillus rhamnosus GG]
gi|258508104|ref|YP_003170855.1|	phage-related DNA-binding protein [Lactobacillus rhamnosus GG]
gi|258508107|ref|YP_003170858.1|	phage-related Holliday junction resolvase [Lactobacillus rhamnosus GG]
gi|258508108|ref|YP_003170859.1|	hypothetical protein LGG_01113 [Lactobacillus rhamnosus GG]
gi|258508109|ref|YP_003170860.1|	hypothetical protein LGG_01114 [Lactobacillus rhamnosus GG]
gi|258508110|ref|YP_003170861.1|	hypothetical protein LGG_01115 [Lactobacillus rhamnosus GG]
gi|258508111|ref|YP_003170862.1|	hypothetical protein LGG_01116 [Lactobacillus rhamnosus GG]
gi|258508112|ref|YP_003170863.1|	hypothetical protein LGG_01117 [Lactobacillus rhamnosus GG]
gi|258508113|ref|YP_003170864.1|	hypothetical protein LGG_01118 [Lactobacillus rhamnosus GG]
gi|258508117|ref|YP_003170868.1|	phage-related HNH endonuclease [Lactobacillus rhamnosus GG]
gi|258508124|ref|YP_003170875.1|	phage-related minor capsid protein (GpG protein) [Lactobacillus rhamnosus GG]
gi|258508134|ref|YP_003170885.1|	phage-related tail-host interaction protein [Lactobacillus rhamnosus GG]
gi|258508135|ref|YP_003170886.1|	hypothetical protein LGG_01140 [Lactobacillus rhamnosus GG]
gi|258508136|ref|YP_003170887.1|	hypothetical protein LGG_01141 [Lactobacillus rhamnosus GG]
gi|258508145|ref|YP_003170896.1|	hypothetical protein LGG_01150 [Lactobacillus rhamnosus GG]
gi|258508146|ref|YP_003170897.1|	hypothetical protein LGG_01151 [Lactobacillus rhamnosus GG]
gi|258508147|ref|YP_003170898.1|	hypothetical protein LGG_01152 [Lactobacillus rhamnosus GG]
gi|258508149|ref|YP_003170900.1|	hypothetical protein LGG_01154 [Lactobacillus rhamnosus GG]
gi|258508231|ref|YP_003170982.1|	hypothetical protein LGG_01236 [Lactobacillus rhamnosus GG]
gi|258508243|ref|YP_003170994.1|	transposase IS5 family protein [Lactobacillus rhamnosus GG]
gi|258508245|ref|YP_003170996.1|	hypothetical protein LGG_01250 [Lactobacillus rhamnosus GG]
gi|258508510|ref|YP_003171261.1|	integrase [Lactobacillus rhamnosus GG]
gi|258508511|ref|YP_003171262.1|	XRE family transcriptional regulator [Lactobacillus rhamnosus GG]
gi|258508512|ref|YP_003171263.1|	hypothetical protein LGG_01517 [Lactobacillus rhamnosus GG]
gi|258508513|ref|YP_003171264.1|	hypothetical protein LGG_01518 [Lactobacillus rhamnosus GG]
gi|258508515|ref|YP_003171266.1|	phage-related holin [Lactobacillus rhamnosus GG]
gi|258508516|ref|YP_003171267.1|	phage-related holin [Lactobacillus rhamnosus GG]
gi|258508517|ref|YP_003171268.1|	phage-related infection protein [Lactobacillus rhamnosus GG]
gi|258508518|ref|YP_003171269.1|	phage-related tail-host specificity protein [Lactobacillus rhamnosus GG]
gi|258508519|ref|YP_003171270.1|	phage-related tail component [Lactobacillus rhamnosus GG]
gi|258508520|ref|YP_003171271.1|	phage-related minor tail protein [Lactobacillus rhamnosus GG]
gi|258508521|ref|YP_003171272.1|	hypothetical protein LGG_01526 [Lactobacillus rhamnosus GG]
gi|258508522|ref|YP_003171273.1|	phage-related tail component [Lactobacillus rhamnosus GG]
gi|258508523|ref|YP_003171274.1|	phage-related major tail protein [Lactobacillus rhamnosus GG]
gi|258508524|ref|YP_003171275.1|	phage-related tail component [Lactobacillus rhamnosus GG]
gi|258508525|ref|YP_003171276.1|	phage-related head-tail joining protein [Lactobacillus rhamnosus GG]
gi|258508526|ref|YP_003171277.1|	phage-related infection protein [Lactobacillus rhamnosus GG]
gi|258508527|ref|YP_003171278.1|	hypothetical protein LGG_01532 [Lactobacillus rhamnosus GG]
gi|258508528|ref|YP_003171279.1|	phage-related prohead protease [Lactobacillus rhamnosus GG]
gi|258508529|ref|YP_003171280.1|	phage-related portal protein [Lactobacillus rhamnosus GG]
gi|258508530|ref|YP_003171281.1|	phage-related terminase large subunit [Lactobacillus rhamnosus GG]
gi|258508531|ref|YP_003171282.1|	phage-related terminase small subunit [Lactobacillus rhamnosus GG]
gi|258508532|ref|YP_003171283.1|	phage-related Resolvase [Lactobacillus rhamnosus GG]
gi|258508533|ref|YP_003171284.1|	phage-related glycosyl transferase, group 2 [Lactobacillus rhamnosus GG]
gi|258508534|ref|YP_003171285.1|	transposase IS5 family protein [Lactobacillus rhamnosus GG]
gi|258508535|ref|YP_003171286.1|	phage-related HNH nuclease [Lactobacillus rhamnosus GG]
gi|258508536|ref|YP_003171287.1|	single-stranded DNA-binding protein [Lactobacillus rhamnosus GG]
gi|258508537|ref|YP_003171288.1|	hypothetical protein LGG_01542 [Lactobacillus rhamnosus GG]
gi|258508538|ref|YP_003171289.1|	hypothetical protein LGG_01543 [Lactobacillus rhamnosus GG]
gi|258508539|ref|YP_003171290.1|	hypothetical protein LGG_01544 [Lactobacillus rhamnosus GG]
gi|258508576|ref|YP_003171327.1|	transposase IS5 family protein [Lactobacillus rhamnosus GG]
gi|258508577|ref|YP_003171328.1|	oxidoreductase [Lactobacillus rhamnosus GG]
gi|258508579|ref|YP_003171330.1|	transposase [Lactobacillus rhamnosus GG]
gi|258508580|ref|YP_003171331.1|	transposase IS4 family protein [Lactobacillus rhamnosus GG]
gi|258508583|ref|YP_003171334.1|	hypothetical protein LGG_01588 [Lactobacillus rhamnosus GG]
gi|258508584|ref|YP_003171335.1|	cell surface protein [Lactobacillus rhamnosus GG]
gi|258508585|ref|YP_003171336.1|	hypothetical protein LGG_01590 [Lactobacillus rhamnosus GG]
gi|258508586|ref|YP_003171337.1|	membrane protein [Lactobacillus rhamnosus GG]
gi|258508587|ref|YP_003171338.1|	hypothetical protein LGG_01592 [Lactobacillus rhamnosus GG]
gi|258508588|ref|YP_003171339.1|	hypothetical protein LGG_01593 [Lactobacillus rhamnosus GG]
gi|258508617|ref|YP_003171368.1|	transposase IS3/IS911 family protein [Lactobacillus rhamnosus GG]
gi|258508618|ref|YP_003171369.1|	transposase IS150/IS3 family protein [Lactobacillus rhamnosus GG]
gi|258508702|ref|YP_003171453.1|	hypothetical protein LGG_01707 [Lactobacillus rhamnosus GG]
gi|258508723|ref|YP_003171474.1|	endopeptidase M23B [Lactobacillus rhamnosus GG]
gi|258508724|ref|YP_003171475.1|	transposase IS605 family protein [Lactobacillus rhamnosus GG]
gi|258508725|ref|YP_003171476.1|	hypothetical protein LGG_01730 [Lactobacillus rhamnosus GG]
gi|258508744|ref|YP_003171495.1|	transposase IS5 family protein [Lactobacillus rhamnosus GG]
gi|258508750|ref|YP_003171501.1|	hypothetical protein LGG_01755 [Lactobacillus rhamnosus GG]
gi|258508843|ref|YP_003171594.1|	hypothetical protein LGG_01848 [Lactobacillus rhamnosus GG]
gi|258508900|ref|YP_003171651.1|	Fic family protein [Lactobacillus rhamnosus GG]
gi|258508946|ref|YP_003171697.1|	aminoglycoside phosphotransferase [Lactobacillus rhamnosus GG]
gi|258508949|ref|YP_003171700.1|	XRE family transcriptional regulator [Lactobacillus rhamnosus GG]
gi|258508950|ref|YP_003171701.1|	reverse transcriptase-like protein [Lactobacillus rhamnosus GG]
gi|258508951|ref|YP_003171702.1|	transposase IS5 family protein [Lactobacillus rhamnosus GG]
gi|258508952|ref|YP_003171703.1|	transposase [Lactobacillus rhamnosus GG]
gi|258508958|ref|YP_003171709.1|	hypothetical protein LGG_01963 [Lactobacillus rhamnosus GG]
gi|258508959|ref|YP_003171710.1|	hypothetical protein LGG_01964 [Lactobacillus rhamnosus GG]
gi|258508960|ref|YP_003171711.1|	transposase IS5 family protein [Lactobacillus rhamnosus GG]
gi|258508962|ref|YP_003171713.1|	hypothetical protein LGG_01967 [Lactobacillus rhamnosus GG]
gi|258508988|ref|YP_003171739.1|	hypothetical protein LGG_01993 [Lactobacillus rhamnosus GG]
gi|258508989|ref|YP_003171740.1|	hypothetical protein LGG_01994 [Lactobacillus rhamnosus GG]
gi|258508990|ref|YP_003171741.1|	hypothetical protein LGG_01995 [Lactobacillus rhamnosus GG]
gi|258508991|ref|YP_003171742.1|	dTDP-4-dehydrorhamnose reductase [Lactobacillus rhamnosus GG]
gi|258508992|ref|YP_003171743.1|	dTDP-glucose 4,6-dehydratase [Lactobacillus rhamnosus GG]
gi|258508993|ref|YP_003171744.1|	dTDP-4-dehydrorhamnose 3,5-epimerase [Lactobacillus rhamnosus GG]
gi|258508994|ref|YP_003171745.1|	glucose-1-phosphate thymidylyltransferase [Lactobacillus rhamnosus GG]
gi|258508995|ref|YP_003171746.1|	lyzozyme M1 [Lactobacillus rhamnosus GG]
gi|258508997|ref|YP_003171748.1|	hypothetical protein LGG_02002 [Lactobacillus rhamnosus GG]
gi|258508998|ref|YP_003171749.1|	transposase IS5 family protein [Lactobacillus rhamnosus GG]
gi|258509028|ref|YP_003171779.1|	transposase IS5 family protein [Lactobacillus rhamnosus GG]
gi|258509033|ref|YP_003171784.1|	dTDP-glucose 4,6-dehydratase [Lactobacillus rhamnosus GG]
gi|258509034|ref|YP_003171785.1|	dTDP-4-dehydrorhamnose 3,5-epimerase [Lactobacillus rhamnosus GG]
gi|258509035|ref|YP_003171786.1|	glucose-1-phosphate thymidyl transferase (Fragment) [Lactobacillus rhamnosus GG]
gi|258509036|ref|YP_003171787.1|	transposase IS5 family protein [Lactobacillus rhamnosus GG]
gi|258509037|ref|YP_003171788.1|	glucose-1-phosphate thymidylyltransferase (Fragment) [Lactobacillus rhamnosus GG]
gi|258509038|ref|YP_003171789.1|	undecaprenyl-phosphate beta-glucosephosphotransferase [Lactobacillus rhamnosus GG]
gi|258509039|ref|YP_003171790.1|	glycosyl transferase, group 1 [Lactobacillus rhamnosus GG]
gi|258509040|ref|YP_003171791.1|	glycosyl transferase,galactofuranosyltransferase [Lactobacillus rhamnosus GG]
gi|258509041|ref|YP_003171792.1|	alpha-L-Rha alpha-1,3-L-rhamnosyltransferase [Lactobacillus rhamnosus GG]
gi|258509042|ref|YP_003171793.1|	glycosyl transferase, group 1 [Lactobacillus rhamnosus GG]
gi|258509043|ref|YP_003171794.1|	glycosyl transferase, alpha-1,3-galactosyltransferase [Lactobacillus rhamnosus GG]
gi|258509044|ref|YP_003171795.1|	PST system family polysaccharide transporter [Lactobacillus rhamnosus GG]
gi|258509046|ref|YP_003171797.1|	O antigen polymerase Wzy [Lactobacillus rhamnosus GG]
gi|258509050|ref|YP_003171801.1|	phage-related infection protein [Lactobacillus rhamnosus GG]
gi|258509051|ref|YP_003171802.1|	phage-related infection protein [Lactobacillus rhamnosus GG]
gi|258509132|ref|YP_003171883.1|	hypothetical protein LGG_02137 [Lactobacillus rhamnosus GG]
gi|258509155|ref|YP_003171906.1|	transposase IS4 family protein [Lactobacillus rhamnosus GG]
gi|258509156|ref|YP_003171907.1|	transposase [Lactobacillus rhamnosus GG]
gi|258509160|ref|YP_003171911.1|	transposase [Lactobacillus rhamnosus GG]
gi|258509161|ref|YP_003171912.1|	transposase IS4 family protein [Lactobacillus rhamnosus GG]
gi|258509166|ref|YP_003171917.1|	transposase IS5 family protein [Lactobacillus rhamnosus GG]
gi|258509172|ref|YP_003171923.1|	hypothetical protein LGG_02177 [Lactobacillus rhamnosus GG]
gi|258509173|ref|YP_003171924.1|	phage-related DNA gyrase inhibitory protein,GyrI [Lactobacillus rhamnosus GG]
gi|258509194|ref|YP_003171945.1|	hypothetical protein LGG_02199 [Lactobacillus rhamnosus GG]
gi|258509195|ref|YP_003171946.1|	hypothetical protein LGG_02200 [Lactobacillus rhamnosus GG]
gi|258509196|ref|YP_003171947.1|	CRISPR-associated protein SAG0897 family [Lactobacillus rhamnosus GG]
gi|258509197|ref|YP_003171948.1|	CRISPR-associated protein Cas2 [Lactobacillus rhamnosus GG]
gi|258509198|ref|YP_003171949.1|	CRISPR-associated protein Cas1 [Lactobacillus rhamnosus GG]
gi|258509199|ref|YP_003171950.1|	CRISPR-associated protein Csn1 [Lactobacillus rhamnosus GG]
gi|258509309|ref|YP_003172060.1|	hypothetical protein LGG_02314 [Lactobacillus rhamnosus GG]
gi|258509310|ref|YP_003172061.1|	hypothetical protein LGG_02315 [Lactobacillus rhamnosus GG]
gi|258509311|ref|YP_003172062.1|	XRE family transcriptional regulator [Lactobacillus rhamnosus GG]
gi|258509322|ref|YP_003172073.1|	XRE family transcriptional regulator [Lactobacillus rhamnosus GG]
gi|258509331|ref|YP_003172082.1|	multidrug ABC transporter ATPase and permease [Lactobacillus rhamnosus GG]
gi|258509353|ref|YP_003172104.1|	hypothetical protein LGG_02358 [Lactobacillus rhamnosus GG]
gi|258509354|ref|YP_003172105.1|	hypothetical protein LGG_02359 [Lactobacillus rhamnosus GG]
gi|258509424|ref|YP_003172175.1|	hypothetical protein LGG_02429 [Lactobacillus rhamnosus GG]
gi|258509440|ref|YP_003172191.1|	transposase IS150/IS3 family protein [Lactobacillus rhamnosus GG]
gi|258509441|ref|YP_003172192.1|	transposase IS3/IS911 family protein [Lactobacillus rhamnosus GG]
gi|258509651|ref|YP_003172402.1|	3-octaprenyl-4-hydroxybenzoate carboxy-lyase [Lactobacillus rhamnosus GG]
gi|258509652|ref|YP_003172403.1|	3-octaprenyl-4-hydroxybenzoate carboxy-lyase [Lactobacillus rhamnosus GG]
gi|258509653|ref|YP_003172404.1|	sodium/sulphate symporter [Lactobacillus rhamnosus GG]
gi|258509654|ref|YP_003172405.1|	LysR family transcriptional regulator [Lactobacillus rhamnosus GG]
gi|258509655|ref|YP_003172406.1|	hypothetical protein LGG_02660 [Lactobacillus rhamnosus GG]
gi|258509671|ref|YP_003172422.1|	transposase IS5 family protein [Lactobacillus rhamnosus GG]
gi|258509692|ref|YP_003172443.1|	transposase IS150/IS3 family protein [Lactobacillus rhamnosus GG]
gi|258509693|ref|YP_003172444.1|	transposase IS3/IS911 family protein [Lactobacillus rhamnosus GG]
gi|258509698|ref|YP_003172449.1|	hypothetical protein LGG_02703 [Lactobacillus rhamnosus GG]
gi|258509737|ref|YP_003172488.1|	hypothetical protein LGG_02742 [Lactobacillus rhamnosus GG]
gi|258509738|ref|YP_003172489.1|	xylulokinase [Lactobacillus rhamnosus GG]
gi|258509739|ref|YP_003172490.1|	sorbitol dehydrogenase [Lactobacillus rhamnosus GG]
gi|258509740|ref|YP_003172491.1|	PTS system mannose/fructose/sorbose-specific transporter subunit IID [Lactobacillus rhamnosus GG]
gi|258509741|ref|YP_003172492.1|	PTS system mannose/fructose/sorbose-specific transporter subunit IIC [Lactobacillus rhamnosus GG]
gi|258509742|ref|YP_003172493.1|	PTS system mannose/fructose/sorbose-specific transporter subunit IIAB [Lactobacillus rhamnosus GG]
gi|258509743|ref|YP_003172494.1|	PTS system mannose/fructose/sorbose-specific transporter subunit IIAB [Lactobacillus rhamnosus GG]
gi|258509744|ref|YP_003172495.1|	PTS system mannose/fructose/sorbose-specific transporter subunit IIA [Lactobacillus rhamnosus GG]
gi|258509745|ref|YP_003172496.1|	transposase IS5 family protein [Lactobacillus rhamnosus GG]
gi|258509746|ref|YP_003172497.1|	fructose-1,6-bisphosphate aldolase [Lactobacillus rhamnosus GG]
gi|258509778|ref|YP_003172529.1|	aldo/keto reductase family oxidoreductase [Lactobacillus rhamnosus GG]
gi|258509779|ref|YP_003172530.1|	MerR family transcriptional regulator [Lactobacillus rhamnosus GG]
gi|258509781|ref|YP_003172532.1|	ADP-ribosylglycohydrolase [Lactobacillus rhamnosus GG]
gi|258509865|ref|YP_003172616.1|	transposase IS3/IS911 family protein [Lactobacillus rhamnosus GG]
gi|258509866|ref|YP_003172617.1|	transposase IS150/IS3 family protein [Lactobacillus rhamnosus GG]
gi|258509870|ref|YP_003172621.1|	NAD-dependent malic enzyme [Lactobacillus rhamnosus GG]
gi|258509871|ref|YP_003172622.1|	malate dehydrogenase [Lactobacillus rhamnosus GG]
gi|258509872|ref|YP_003172623.1|	citrate carrier protein [Lactobacillus rhamnosus GG]
gi|258509873|ref|YP_003172624.1|	two component sensor transduction histidine kinase [Lactobacillus rhamnosus GG]
gi|258509874|ref|YP_003172625.1|	two-component response regulator [Lactobacillus rhamnosus GG]
gi|258509880|ref|YP_003172631.1|	phage-related integrase [Lactobacillus rhamnosus GG]
gi|258509881|ref|YP_003172632.1|	transcriptional regulator [Lactobacillus rhamnosus GG]
gi|258509889|ref|YP_003172640.1|	phage-related virulence-associated protein E [Lactobacillus rhamnosus GG]
gi|258509890|ref|YP_003172641.1|	hypothetical protein LGG_02895 [Lactobacillus rhamnosus GG]
gi|258509939|ref|YP_003172690.1|	integrase [Lactobacillus rhamnosus GG]
